# Supplementary figures and images for: Anisotropic excitation of surface plasmon polaritons on a metal film by a scattering-type scanning near-field microscope with a non-rotationally-symmetric probe tip
Source: publisher site journal article supplement (doi:10.1515/nanoph-2017-0042), 2017-08-10

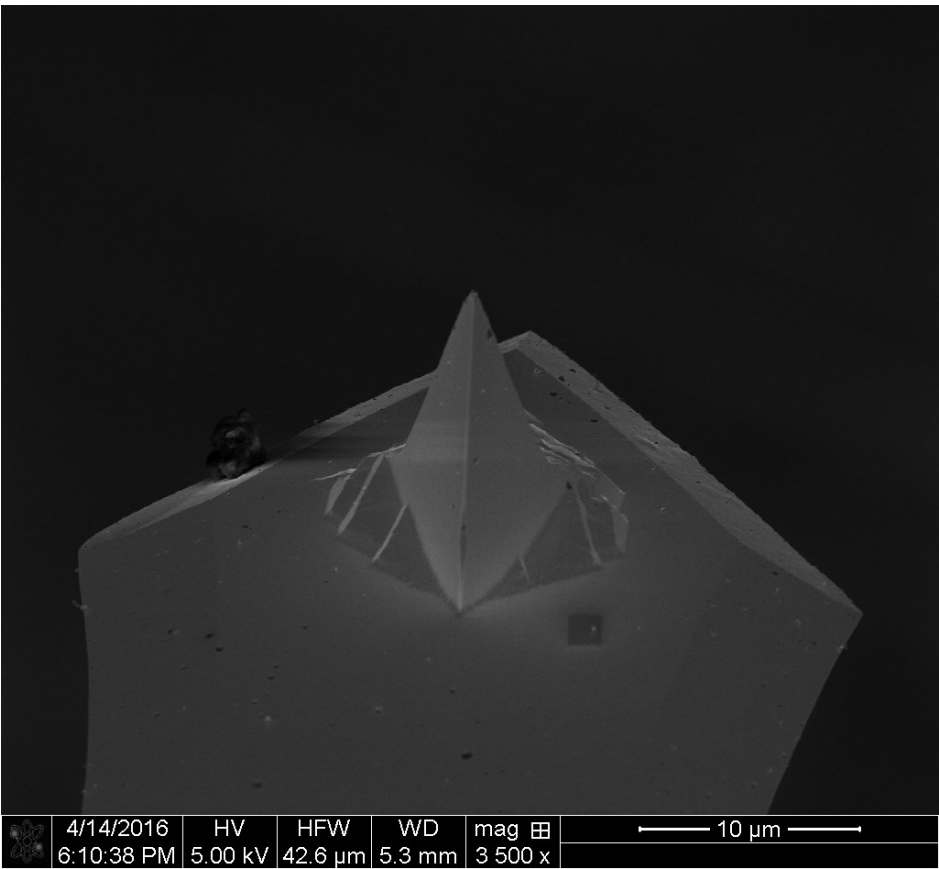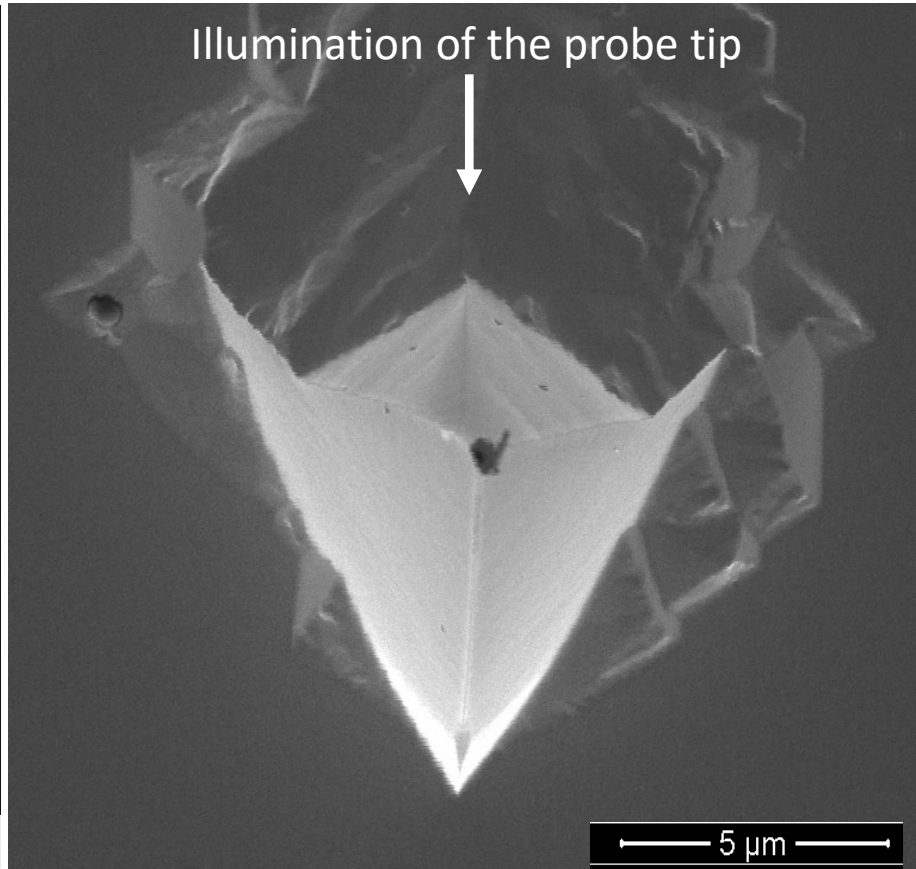

Supplement: Supplementary file 1 [file Probe-tip.pdf › Probe-tip.pdf]

(a)  $2\Omega$

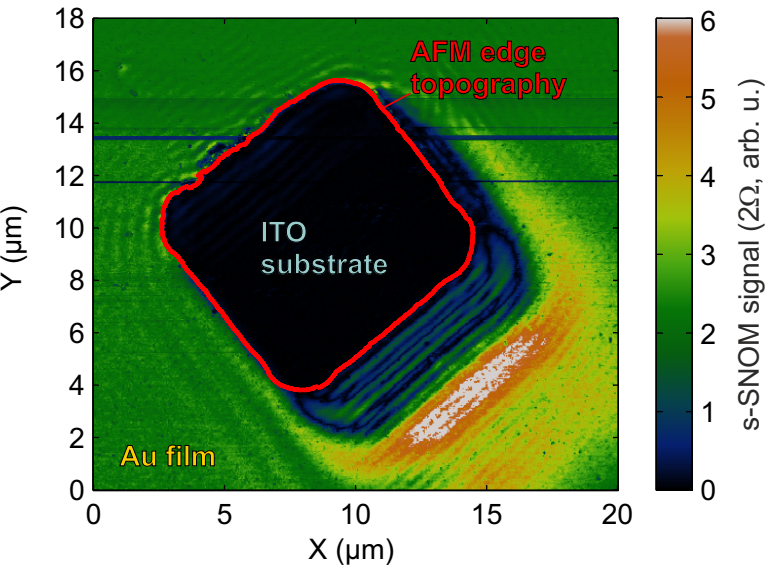

(b)  $3\Omega$

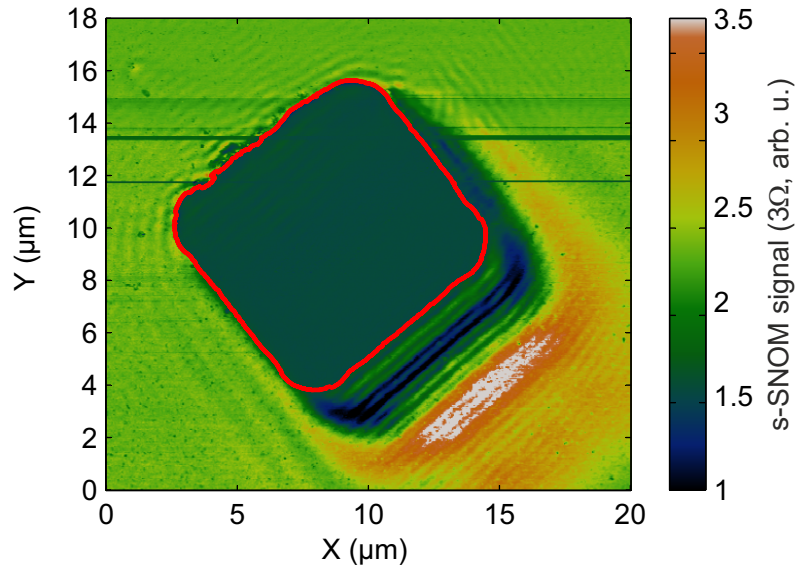

Supplement: Supplementary file 3 [file supp_fig1.pdf › supp_fig1.pdf]

$\Phi=85^\circ$

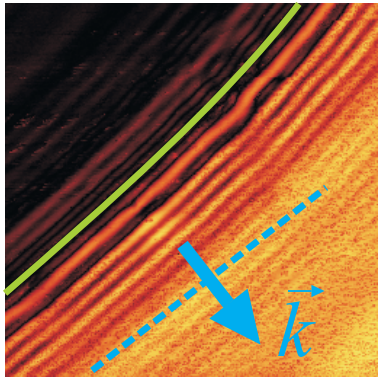

$\Phi=110^\circ$

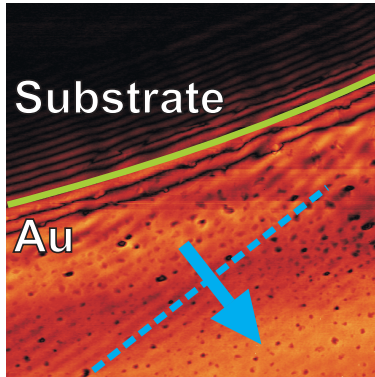

$\Phi=145^\circ$

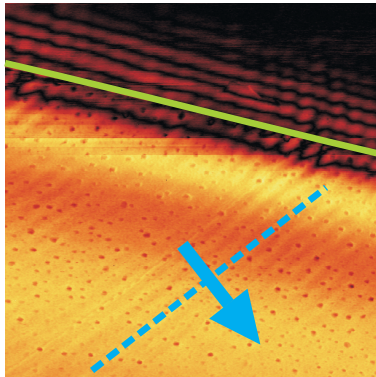

Supplement: Supplementary file 4 [file supp_fig2.pdf › supp_fig2.pdf]
